# Supplementary material
Source: PubMed Central journal article supplement (PMC2991507)
Supplement: NIHMS235627-supplement-1.pdf [file NIHMS235627-supplement-1.pdf]

Table S1. Adjusted association of signs and symptoms prior to dialysis initiation with earlier initiation of dialysis (eGFR >15 ml/min/1.73m<sup>2</sup>) among nursing home residents

| Sign or symptom                         | Odds ratio and 95% confidence interval                                    |                                                                           |
|-----------------------------------------|---------------------------------------------------------------------------|---------------------------------------------------------------------------|
|                                         | Among residents with ≥2 assessments prior to dialysis initiation (N=2402) | Among residents with ≥1 assessments prior to dialysis initiation (N=3642) |
| Extensive assistance needed in all ADLs | 1.23 (0.95-1.62)                                                          | 1.44 (1.14-1.82)                                                          |
| Moderate to severe cognitive impairment | 0.84 (0.67-1.04)                                                          | 0.87 (0.72-1.05)                                                          |
| Edema                                   | 1.54 (1.24-1.92)                                                          | 1.49 (1.24-1.80)                                                          |
| Dyspnea                                 | 1.95 (1.40-2.73)                                                          | 1.74 (1.30-2.34)                                                          |
| Nutritional problem                     | 1.17 (0.91-1.50)                                                          | 1.25 (1.03-1.51)                                                          |
| Vomiting                                | 0.71 (0.43-1.15)                                                          | 0.68 (0.44-1.07)                                                          |
| Body mass index (kg/m <sup>2</sup> )    |                                                                           |                                                                           |
| ≤18.5                                   | 1.34 (0.86-2.10)                                                          | 1.48 (1.01-2.17)                                                          |
| >18.5 and ≤25                           | 0.93 (0.71-1.21)                                                          | 1.02 (0.82-1.29)                                                          |
| >25 and ≤30                             | 0.81 (0.60-1.08)                                                          | 0.89 (0.69-1.14)                                                          |
| >30                                     | 1.00 (Referent)                                                           | 1.00 (Referent)                                                           |

Abbreviations: eGFR (estimated glomerular filtration rate, in ml/min/1.73m<sup>2</sup>), ADL (activities of daily living).

Models adjusted for age, sex, race, diabetes, congestive heart failure, coronary artery disease, peripheral vascular disease, cerebrovascular disease, chronic obstructive pulmonary disease, and cancer.
