# Supplementary material
Source: PubMed Central journal article supplement (PMC2991507)
Supplement: NIHMS235627-supplement-3.pdf [file NIHMS235627-supplement-3.pdf]

Table S3. Association of signs and symptoms prior to dialysis initiation with various definitions of earlier initiation. Results are expressed as multivariable adjusted odds ratio (OR) and 95% confidence interval (95% CI). Models are adjusted for individual sign or symptom and resident characteristics.

| Sign or Symptom                         | MDRD eGFR<br>≥15 ml/min/1.73m <sup>2</sup><br>(N=440) | CKD-EPI eGFR<br>≥15 ml/min/1.73m <sup>2</sup><br>(N=291) | Cockcroft Gault CrCl<br>≥15 ml/min<br>(N=449) |
|-----------------------------------------|-------------------------------------------------------|----------------------------------------------------------|-----------------------------------------------|
| Extensive assistance needed in all ADLs | 1.23 (0.95-1.62)                                      | 1.23 (0.90-1.69)                                         | 1.45 (1.09-1.91)                              |
| Moderate to severe cognitive impairment | 0.84 (0.67-1.04)                                      | 0.88 (0.68-1.14)                                         | 0.65 (0.51-0.82)                              |
| Edema                                   | 1.54 (1.24-1.92)                                      | 1.74 (1.35-2.25)                                         | 1.71 (1.36-2.14)                              |
| Dyspnea                                 | 1.95 (1.40-2.73)                                      | 2.43 (1.68-3.50)                                         | 2.23 (1.59-3.13)                              |
| Nutritional problem                     | 1.17 (0.91-1.50)                                      | 1.04 (0.80-1.36)                                         | 0.68 (0.53-0.87)                              |
| Vomiting                                | 0.71 (0.43-1.15)                                      | 0.80 (0.46-1.39)                                         | 0.81 (0.51-1.28)                              |
| Body mass index (kg/m <sup>2</sup> )    |                                                       |                                                          |                                               |
| ≤18.5                                   | 1.34 (0.86-2.10)                                      | 1.71 (1.03-2.84)                                         | 0.25 (0.14-0.45)                              |
| >18.5 and ≤25                           | 0.93 (0.71-1.21)                                      | 0.88 (0.64-1.21)                                         | 0.21 (0.15-0.28)                              |
| >25 and ≤30                             | 0.81 (0.60-1.08)                                      | 1.04 (0.75-1.46)                                         | 0.39 (0.30-0.52)                              |
| >30                                     | 1.00 (Referent)                                       | 1.00 (Referent)                                          | 1.00 (Referent)                               |

Abbreviations: eGFR - estimated glomerular filtration rate, MDRD - modification of diet in renal disease equation, CrCl - creatinine clearance.
